# Supplementary material for: Corrosion inhibition performance of benzimidazole derivatives for protection of carbon steel in hydrochloric acid solution
Source: Royal Society of Chemistry journal article supplement (doi:10.1039/d4ra05070c), 2024-01-01
Supplement: d4ra05070c1.pdf [file d4ra05070c1.pdf]

# Corrosion inhibition performance of benzimidazole derivatives for protection of carbon steel in hydrochloric acid solution

N. Timoudan<sup>1</sup>, Arej S. Al-Gorair<sup>2\*</sup>, L. El Foujji<sup>3,4</sup>, I. Warad<sup>5,6</sup>, Z. Safi<sup>7</sup>, B. Dikici<sup>8</sup>, F. Benhiba<sup>1,9</sup>, A. El Kacem Qaiss<sup>10</sup>, R. Bouhfid<sup>10</sup>, F. Bentiss<sup>11</sup>, , Salih S. Al-Juaid<sup>12</sup>, Metwally Abdallah<sup>13,14\*</sup>, A. Zarrouk<sup>1,6\*</sup>

<sup>1</sup> Laboratory of Materials, Nanotechnology and Environment, Faculty of Sciences, Mohammed V University in Rabat, P.O. Box. 1014, Rabat, Morocco

<sup>2</sup> Chem. Depart., College of Science., Princess Nourah bint Abdulrahman Univ., Riyadh, Saudi Arabia

<sup>3</sup> Moroccan Foundation of Advanced Science Innovation and Research MAScIR, Composites and Nanocomposites

Center, Rabat Design Center, Madinat Al Irfane, Rabat, Morocco

<sup>4</sup> Laboratoire de Chimie Organique Hétérocyclique, Faculté des Sciences, Université Mohammed V de Rabat, Morocco

<sup>5</sup> Department of Chemistry, AN-Najah National University, P.O. Box 7, Nablus, Palestine

<sup>6</sup> Research Centre, Manchester Salt & Catalysis, unit C, 88-90 Chorlton Rd, M15 4AN, Manchester, United Kingdom

<sup>7</sup> Al Azhar University – Gaza, Chemistry Department, Faculty of Science, P.O. Box 1277, Gaza, Palestine

<sup>8</sup> Ataturk University, Department of Mechanical Engineering, 25240 Erzurum, Turkey

<sup>9</sup> Higher Institute of Nursing Professions and Health Techniques of Agadir Annex Guelmim, Morocco

<sup>10</sup> Mohammed VI Polytechnic University, Lot 660 Hay Moulay Rachid, Ben Guerir, 43150, Morocco

<sup>11</sup> Laboratory of Catalysis and Corrosion of Materials (LCCM), Faculty of Sciences, Chouaib Doukkali University,

PO Box 20, M-24000 El Jadida, Morocco

<sup>12</sup> Chem. Depart., Faculty of Faculty of Science, King Abdulaziz University, Jeddah, Saudi Arabia

<sup>13</sup> Chem. Depart., Faculty of Science, Umm Al-Qura University, Makkah, Saudi Arabia

<sup>14</sup> Chem. Depart., Faculty of Science, Benha University, Benha, Egypt

## Corresponding authors

Prof. Dr. Abdelkader Zarrouk

Email : [azarrouk@gmail.com](mailto:azarrouk@gmail.com)

Prof. Dr. Metwally Abdallah

Email : [metwally555@yahoo.com](mailto:metwally555@yahoo.com)

Dr. Arej S. Al-Gorair

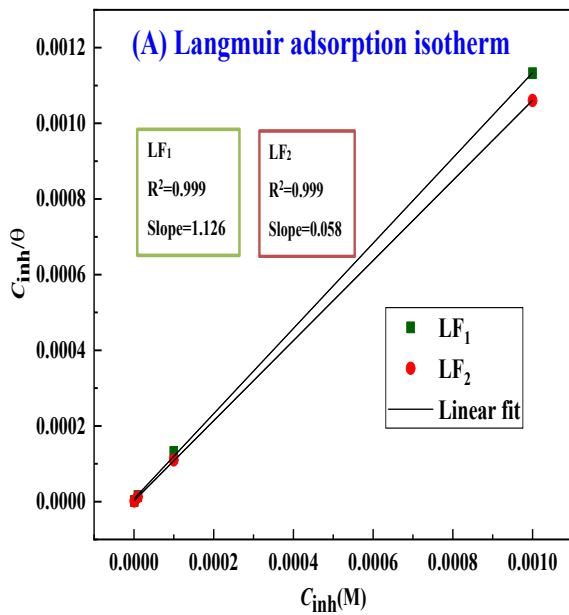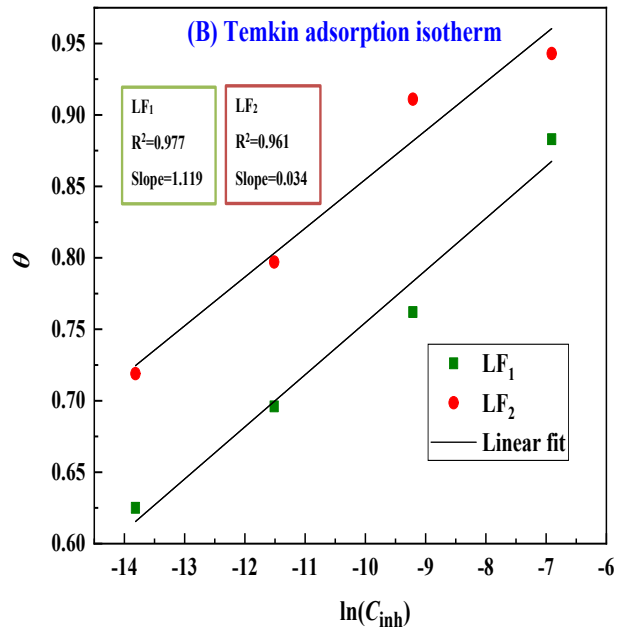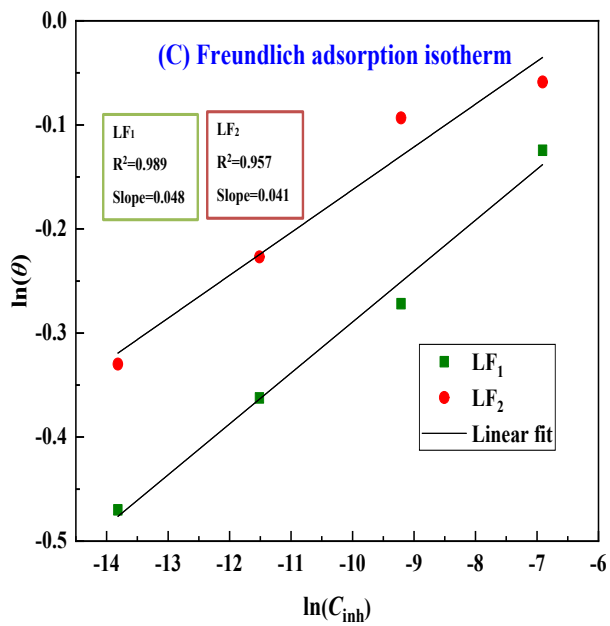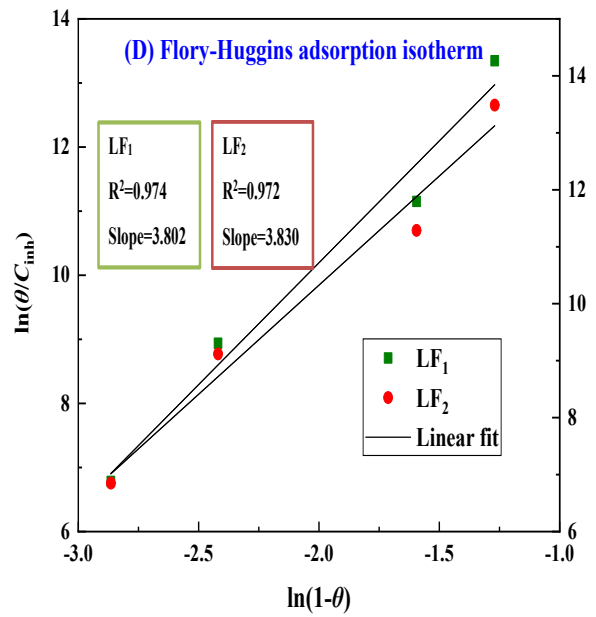

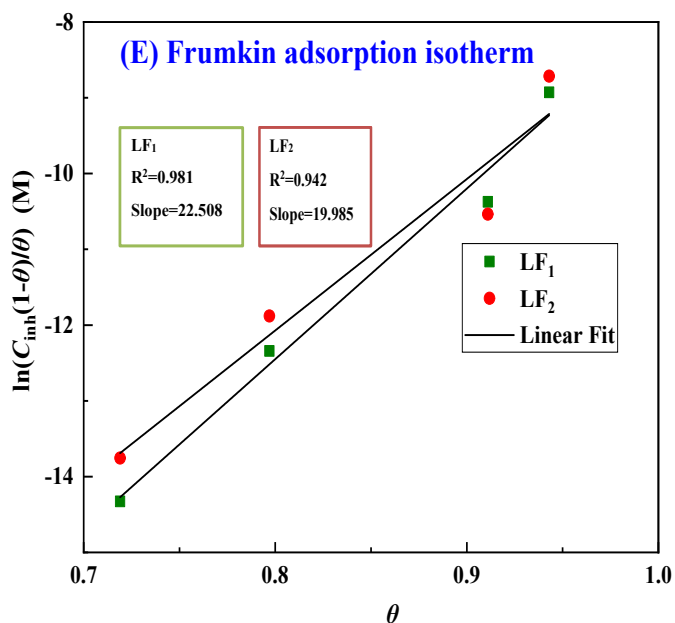

**Figure S1** Plots of various adsorption isotherms for LF1 and LF2 adsorption on C.S. substrates.

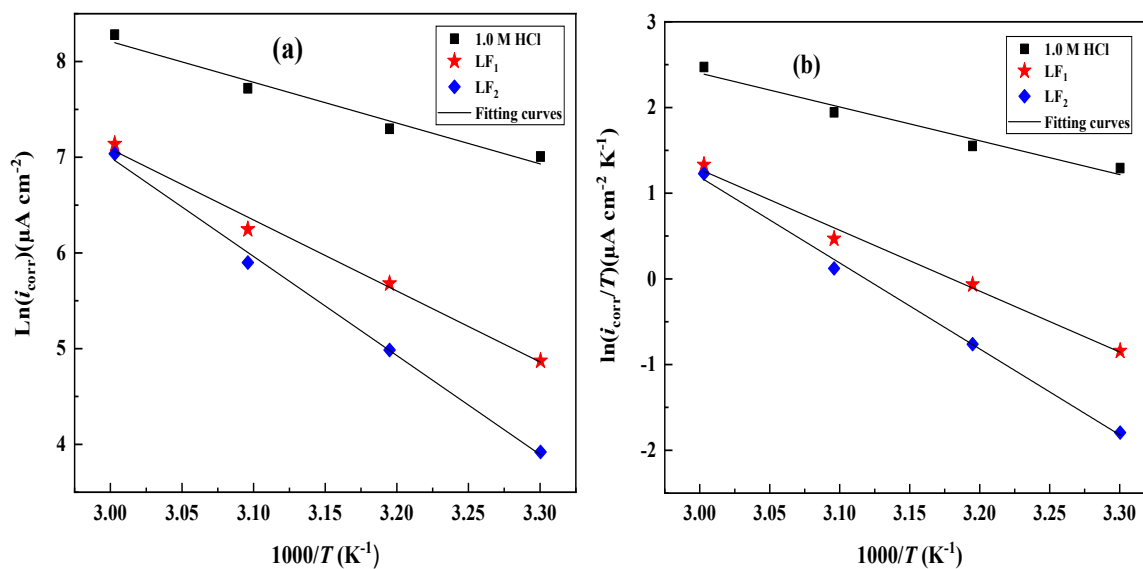

**Figure S2** Variation of  $\ln i_{\text{corr}}$  as a function of  $1/T$  (a) and  $\ln i_{\text{corr}}/T$  as a function of  $1/T$  (b) of C.S. in 1.0 M HCl before and after the addition of LF<sub>1</sub> & LF<sub>2</sub> at  $1 \times 10^{-3}$  M.

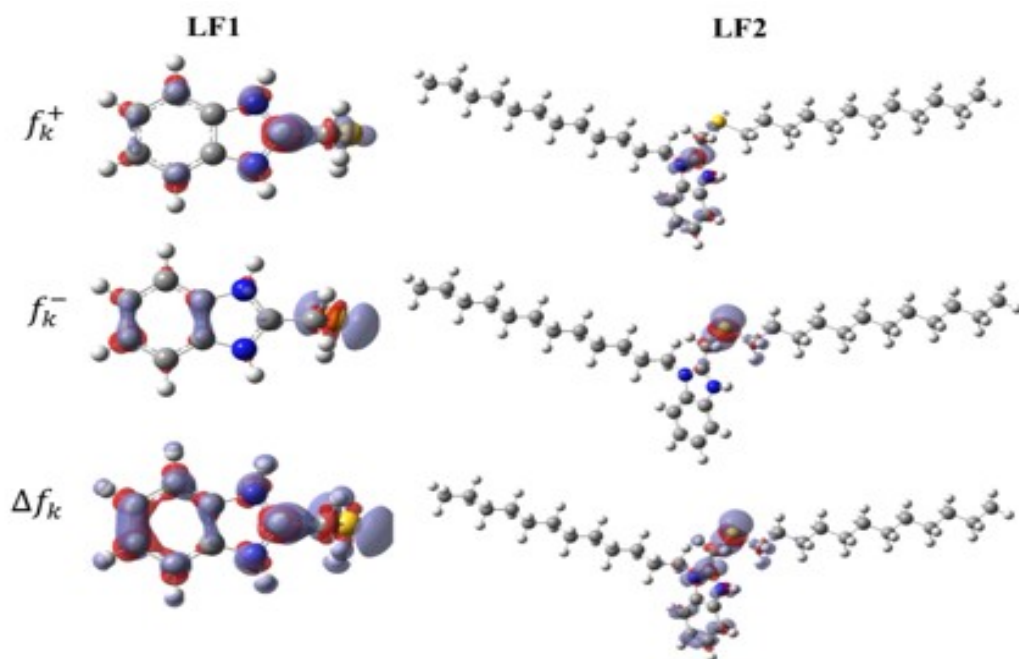

**Figure S3** 3D-isosurface of the Fukui functions of the  $f_k^+$ ,  $f_k^-$ , &  $\Delta f_k$  of the investigated molecules LF<sub>1</sub>, & LF<sub>2</sub>.

**Table S1** Fukui functions of LF1 (neutral and protonated).

| Atom       | q(N)    | q(N+1)  | q(N-1)  | $f_k^-$ | $f_k^+$ | $\Delta f_k$ |
|------------|---------|---------|---------|---------|---------|--------------|
| Neutral    |         |         |         |         |         |              |
| C1         | 0.0013  | -0.0343 | 0.0899  | 0.0886  | 0.0356  | -0.0531      |
| C2         | 0.0263  | 0       | 0.0851  | 0.0588  | 0.0263  | -0.0325      |
| C3         | -0.0544 | -0.1396 | 0.0215  | 0.0759  | 0.0853  | 0.0093       |
| C4         | -0.0514 | -0.1234 | 0.0792  | 0.1306  | 0.072   | -0.0586      |
| C5         | -0.0571 | -0.108  | -0.0006 | 0.0565  | 0.051   | -0.0055      |
| C6         | -0.0542 | -0.1439 | 0.0327  | 0.0868  | 0.0898  | 0.003        |
| C7         | 0.0941  | 0.0116  | 0.1766  | 0.0825  | 0.0825  | 0            |
| N12        | -0.2435 | -0.3092 | -0.1525 | 0.091   | 0.0657  | -0.0253      |
| N13        | -0.0445 | -0.0791 | -0.0097 | 0.0348  | 0.0346  | -0.0002      |
| C15        | -0.0409 | -0.0726 | -0.0265 | 0.0144  | 0.0317  | 0.0173       |
| S18        | -0.0928 | -0.2329 | -0.0448 | 0.048   | 0.1401  | 0.0921       |
| Protonated |         |         |         |         |         |              |
| C1         | 0.0504  | 0.0252  | 0.1125  | 0.0621  | 0.0251  | -0.037       |
| C2         | 0.0499  | 0.0247  | 0.1018  | 0.0519  | 0.0252  | -0.0267      |
| C3         | -0.0263 | -0.0946 | 0.0077  | 0.034   | 0.0683  | 0.0343       |
| C4         | -0.0244 | -0.0797 | 0.0556  | 0.08    | 0.0553  | -0.0247      |
| C5         | -0.0242 | -0.0804 | 0.0351  | 0.0593  | 0.0562  | -0.0031      |
| C6         | -0.0265 | -0.0944 | 0.0073  | 0.0338  | 0.0679  | 0.0342       |
| C7         | 0.1684  | 0.0415  | 0.2059  | 0.0375  | 0.127   | 0.0894       |
| N12        | 0.0037  | -0.0597 | 0.0346  | 0.0309  | 0.0634  | 0.0326       |
| N13        | 0.0063  | -0.0579 | 0.0299  | 0.0235  | 0.0642  | 0.0406       |

|     |         |         |        |        |        |         |
|-----|---------|---------|--------|--------|--------|---------|
| C15 | -0.0221 | -0.0562 | 0.0045 | 0.0266 | 0.0341 | 0.0075  |
| S18 | -0.0329 | -0.178  | 0.2981 | 0.331  | 0.1451 | -0.1859 |

**Table S2** Fukui functions of LF2 (protonated).

| Ato | Atom No. | q(N)    | q(N+1)  | q(N-1)  | $f_k^-$ | $f_k^+$ | $\Delta f_k$ |
|-----|----------|---------|---------|---------|---------|---------|--------------|
| C   | 1        | 0.0424  | 0.0204  | 0.063   | 0.0206  | 0.022   | 0.0014       |
| C   | 2        | 0.048   | 0.0219  | 0.0678  | 0.0199  | 0.0261  | 0.0062       |
| C   | 3        | -0.0276 | -0.1035 | -0.0118 | 0.0158  | 0.0759  | 0.0601       |
| C   | 4        | -0.0261 | -0.0845 | 0.0043  | 0.0304  | 0.0583  | 0.0279       |
| C   | 5        | -0.026  | -0.0873 | -0.0048 | 0.0212  | 0.0612  | 0.04         |
| C   | 6        | -0.0303 | -0.1025 | -0.0145 | 0.0158  | 0.0722  | 0.0564       |
| C   | 7        | 0.1588  | 0.0409  | 0.1654  | 0.0066  | 0.1178  | 0.1113       |
| N   | 12       | 0.0286  | -0.0186 | 0.0438  | 0.0152  | 0.0472  | 0.032        |
| N   | 13       | 0.0003  | -0.0581 | 0.0145  | 0.0142  | 0.0584  | 0.0443       |
| C   | 15       | -0.0338 | -0.0601 | -0.0009 | 0.0329  | 0.0263  | -0.0066      |
| S   | 18       | -0.0192 | -0.1104 | 0.4366  | 0.4558  | 0.0912  | -0.3646      |
| C   | 19       | -0.0426 | -0.0494 | -0.0051 | 0.0375  | 0.0068  | -0.0308      |
| C   | 20       | -0.0432 | -0.0485 | -0.0334 | 0.0098  | 0.0054  | -0.0044      |
| C   | 23       | -0.0412 | -0.0436 | -0.0347 | 0.0064  | 0.0024  | -0.004       |
| C   | 26       | -0.044  | -0.045  | -0.0406 | 0.0034  | 0.0009  | -0.0024      |
| C   | 31       | -0.0455 | -0.046  | -0.0438 | 0.0017  | 0.0005  | -0.0012      |
| C   | 32       | -0.046  | -0.0462 | -0.0451 | 0.0008  | 0.0003  | -0.0006      |
| C   | 35       | -0.0464 | -0.0465 | -0.0459 | 0.0004  | 0.0001  | -0.0003      |
| C   | 38       | -0.0464 | -0.0464 | -0.0461 | 0.0002  | 0.0001  | -0.0002      |
| C   | 43       | -0.0465 | -0.0465 | -0.0464 | 0.0001  | 0       | -0.0001      |
| C   | 44       | -0.0467 | -0.0467 | -0.0466 | 0.0001  | 0       | 0            |
| C   | 47       | -0.0448 | -0.0448 | -0.0447 | 0       | 0       | 0            |
| C   | 50       | -0.0861 | -0.0861 | -0.086  | 0       | 0       | 0            |
| C   | 56       | 0.0246  | 0.0141  | 0.0309  | 0.0064  | 0.0104  | 0.0041       |
| C   | 57       | -0.0428 | -0.0484 | -0.04   | 0.0028  | 0.0056  | 0.0028       |
| C   | 60       | -0.0393 | -0.0428 | -0.0377 | 0.0017  | 0.0035  | 0.0018       |
| C   | 63       | -0.0428 | -0.0445 | -0.0418 | 0.001   | 0.0017  | 0.0007       |
| C   | 68       | -0.0449 | -0.0458 | -0.0444 | 0.0005  | 0.0009  | 0.0003       |
| C   | 69       | -0.0458 | -0.0463 | -0.0455 | 0.0003  | 0.0004  | 0.0001       |
| C   | 72       | -0.0462 | -0.0464 | -0.046  | 0.0001  | 0.0002  | 0.0001       |
| C   | 75       | -0.0464 | -0.0465 | -0.0463 | 0.0001  | 0.0001  | 0            |
| C   | 80       | -0.0464 | -0.0465 | -0.0464 | 0       | 0.0001  | 0            |
| C   | 81       | -0.0467 | -0.0467 | -0.0466 | 0       | 0       | 0            |
| C   | 84       | -0.0448 | -0.0448 | -0.0447 | 0       | 0       | 0            |
| C   | 87       | -0.0861 | -0.0861 | -0.086  | 0       | 0       | 0            |
